# Supplementary material for: Charge-reversal silver clusters for targeted bacterial killing
Source: Royal Society of Chemistry journal article supplement (doi:10.1039/d1tb00378j), 2021-01-01
Supplement: d1tb00378j1.pdf [file d1tb00378j1.pdf]

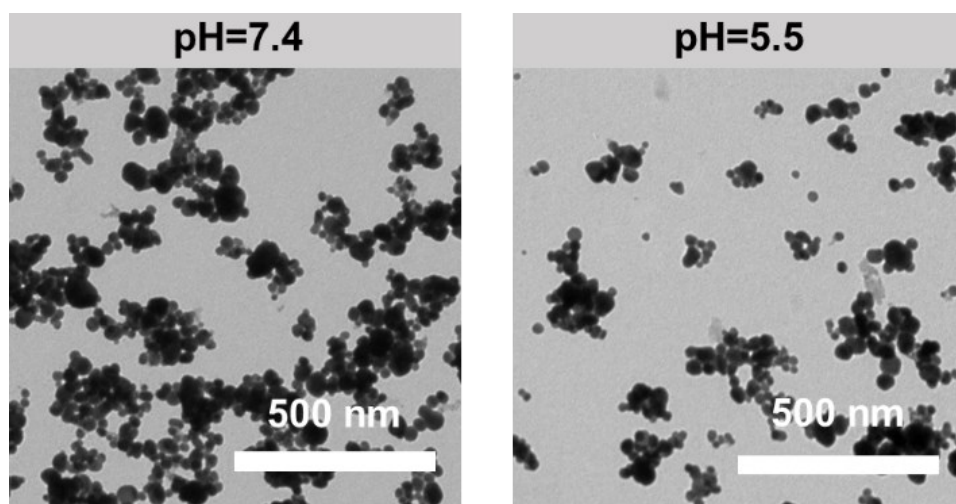

Figure S1. The TEM pictures of Ag(-)/Ag(+) cluster at different pH.

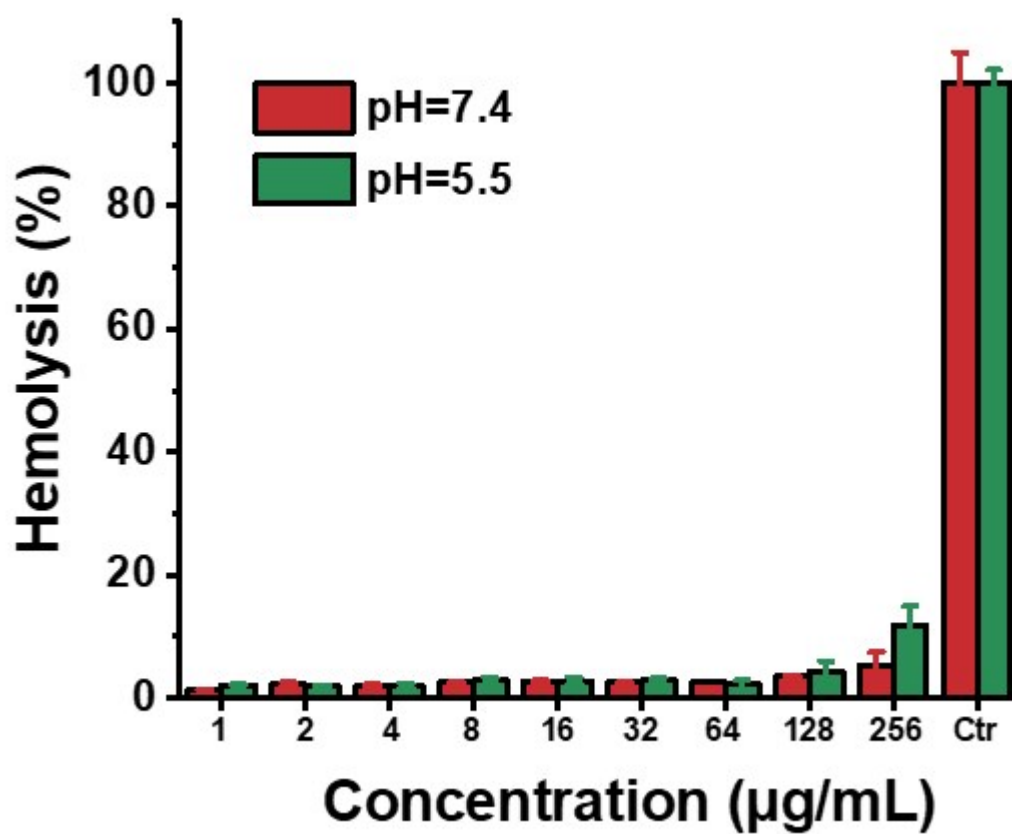

Figure S2. The hemolysis evaluation of Ag(-)/Ag(+) cluster at different pH.

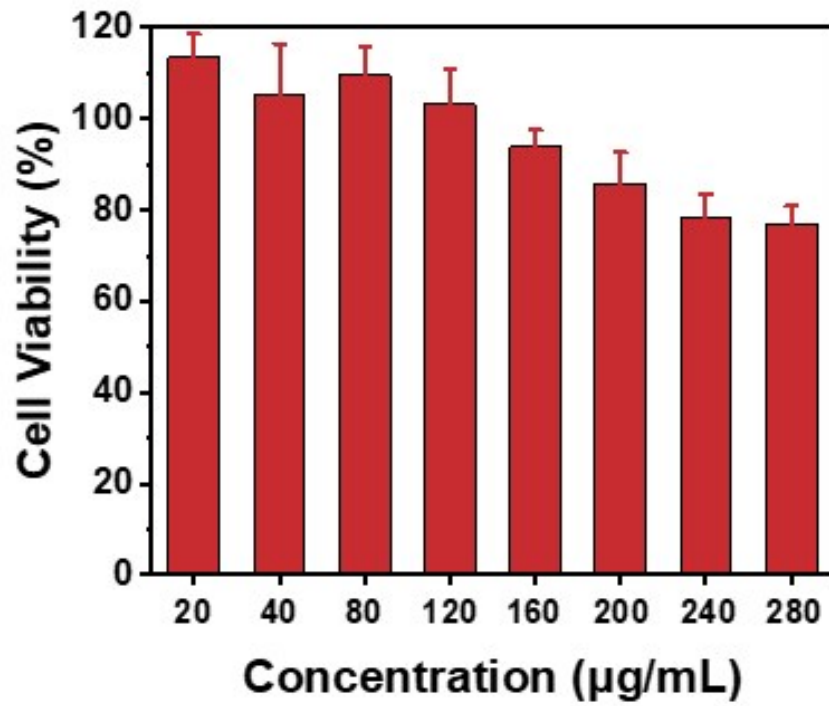

Figure.S3 The cytotoxicity of Ag(-)/Ag(+) cluster in 3T3 cells.

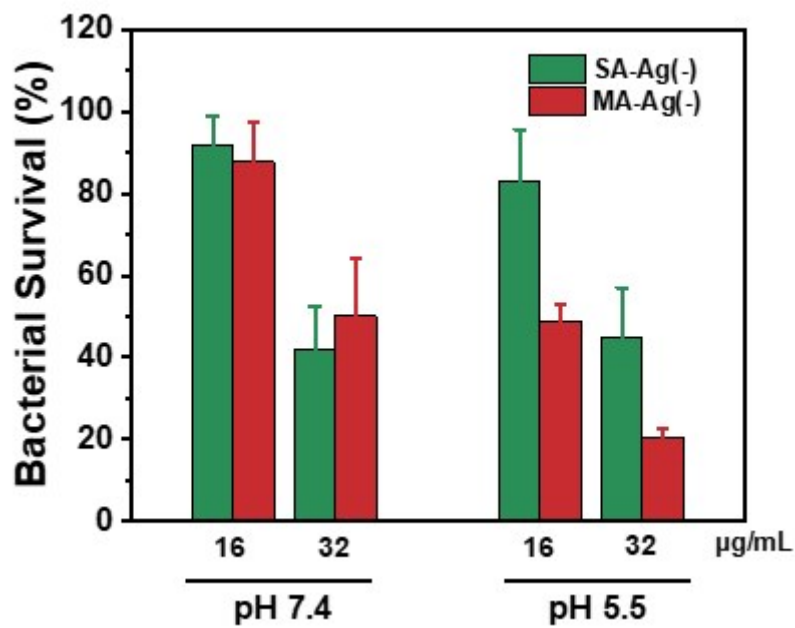

Figure.S4 The bacterial killing experiments of SA-Ag(-) and MA-Ag(-) at different pH.

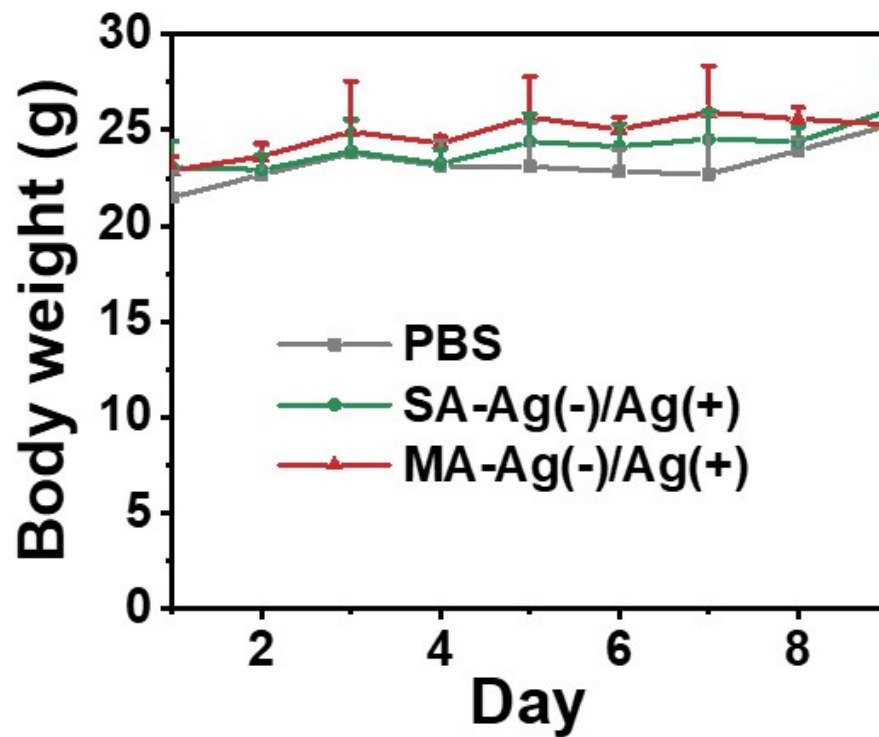

Figure S5. The weight changes of each group during the wound repair experiment.

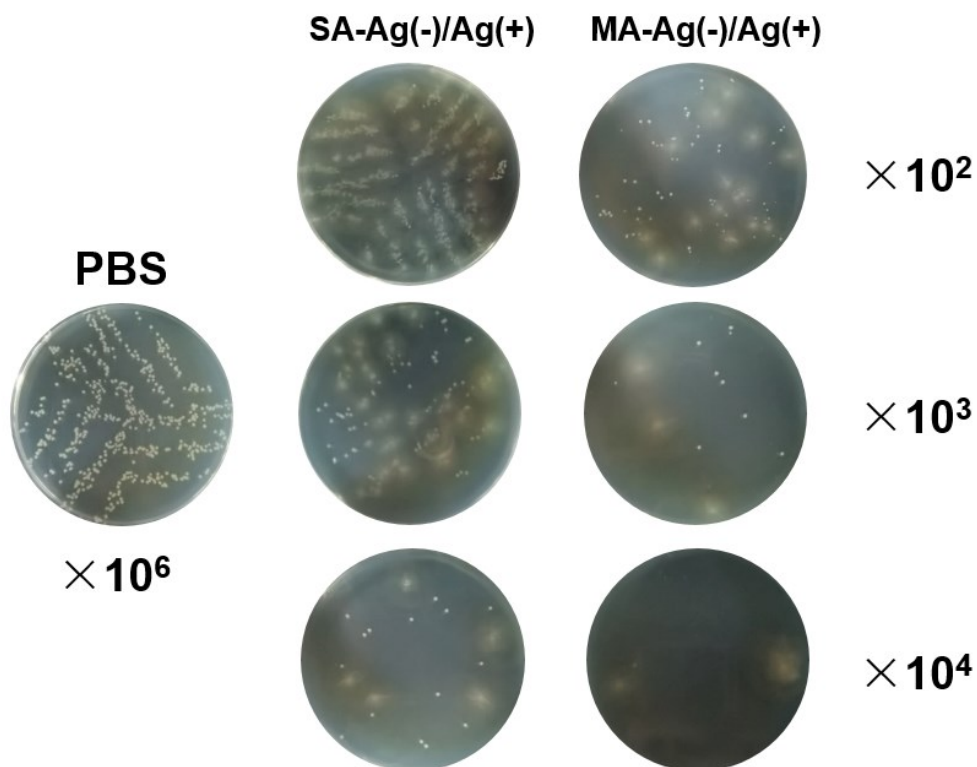

Figure.S6 Bacterial density in wound homogenate of each group at the end of treatment.
